# Supplementary material for: Immunologic Control of Disseminated Aichi Virus Infection in X-Linked Agammaglobulinemia by Transplantation of TcRαβ-Depleted Haploidentical Hematopoietic Cells
Source: Springer Nature journal article supplement (doi:10.1007/s10875-022-01314-5), 2022-07-05
Supplement: MOESM2 [file 23239954]

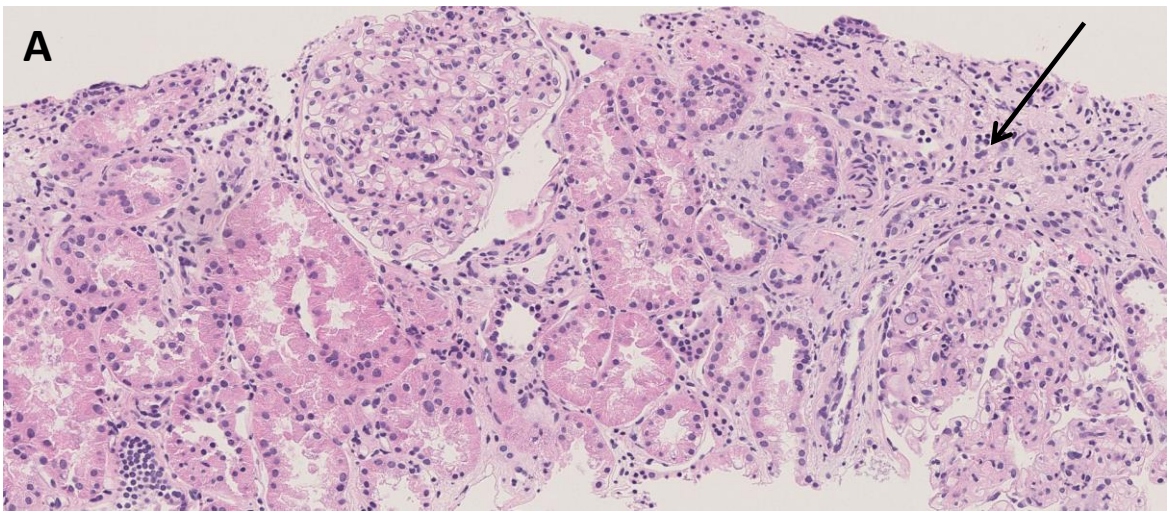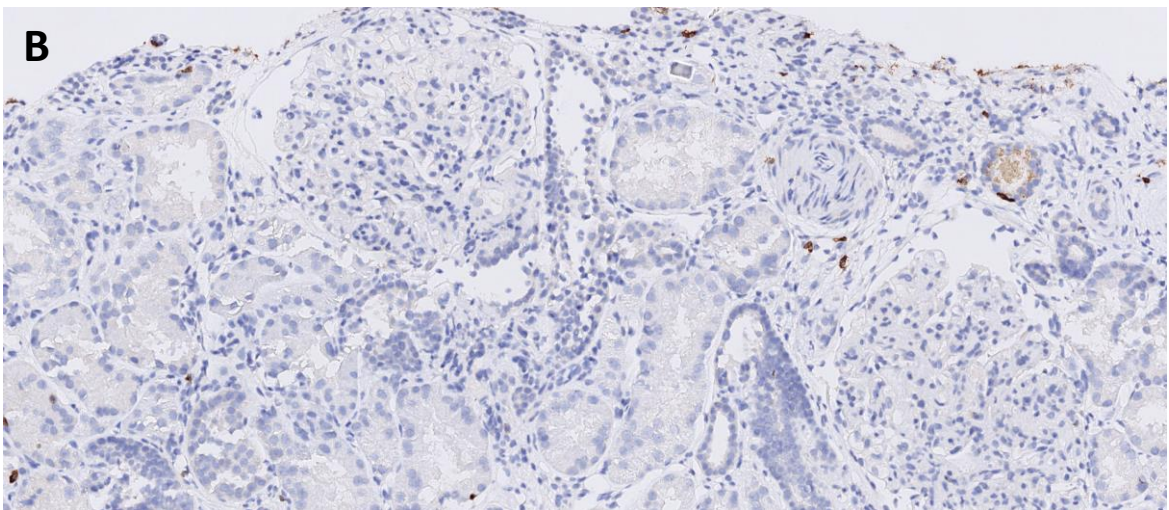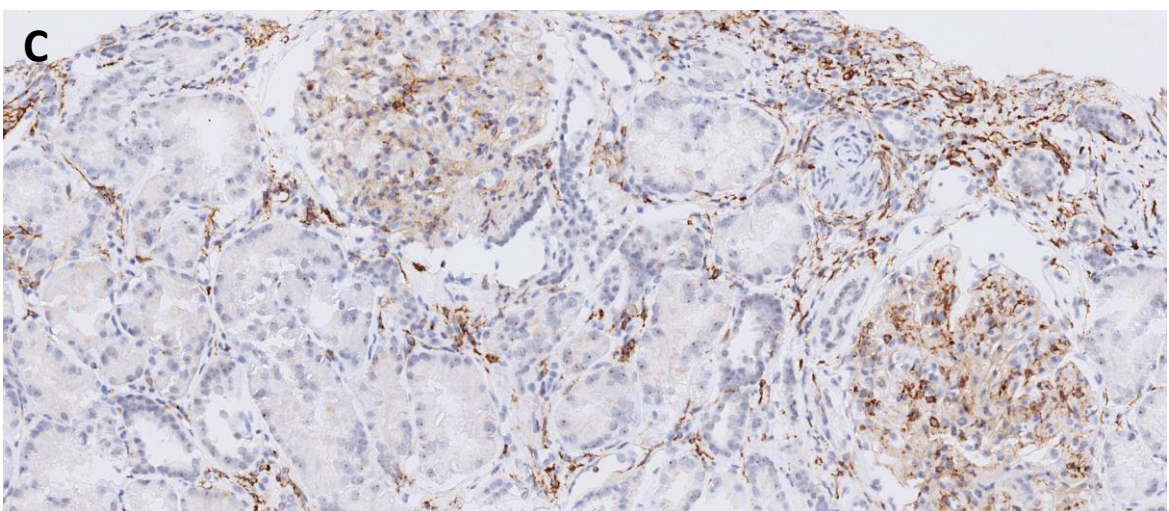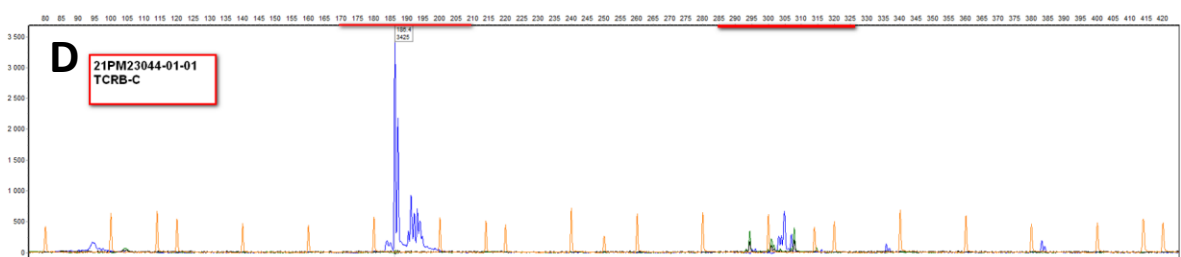

**Supplementary Figure 2.** Kidney biopsy post-HCT. **A)** Some residual tubulointerstitial inflammation with fibrosis (arrow). Hematoxylin and eosin stain, original magnification x200. **B)** Immunohistochemical stain showing very few CD8 positive T-cells (brown color, original magnification x200). **C)** Immunohistochemical stain showing CD4 positive T-cells composing inflammatory infiltrates (brown color, original magnification x200). **D)** PCR analysis of the kidney showing an incomplete monoclonal rearrangement of *TCRB* (smaller peaks), different from the pre-transplant analysis, and interpreted as reactive.
